# Supplementary material
Source: HighWire-hosted journal article supplement (https://erj.ersjournals.com/content/54/2/1801762)
Supplement: inline-supplementary-material-3 [file inline-supplementary-material-3.pdf]

**a**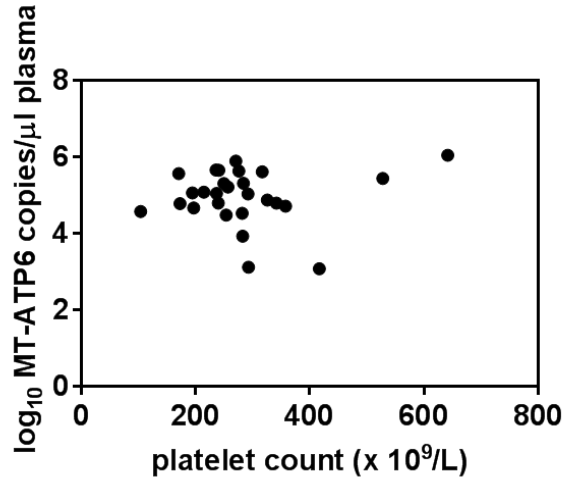**b**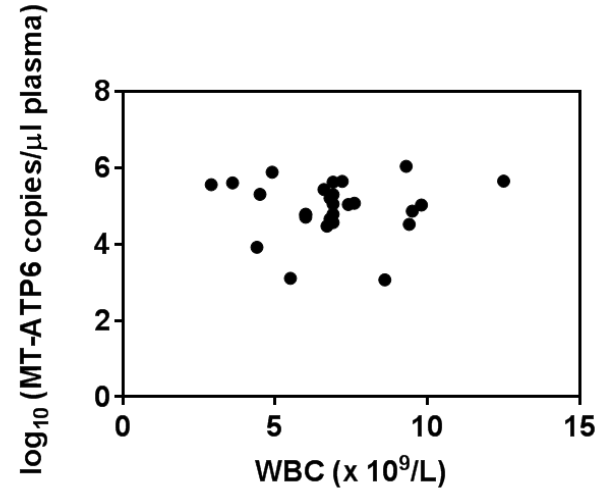

**Figure S2. Plasma mtDNA is not associated with platelet or white blood cell counts in the Yale cohort.** There was no correlation between plasma MT-ATP6 concentrations and **(a)** platelet counts (x 10<sup>9</sup>/L, n=27, Spearman  $r=-0.017$ ,  $p=0.933$ ) or **(b)** white blood cell counts (x 10<sup>9</sup>/L, n=27, Spearman  $r=0.047$ ,  $p=0.818$ ) in the Yale cohort.
